# Supplementary material
Source: ML conference proceedings conference paper supplement (https://openreview.net/forum?id=86zAUE80pP)
Supplement: supplementary_material [file attachment]

## Sheet: Likert
POST	Topic	ChatGPT-summary	Likert scale	Human-summary	Likert scale	GPT2-XL(CPPO)-summary	Likert scale	GPT2-XL(PPO)-summary	Likert scale
AVG			4.76		4.9		4.73		4.37
Var			1.0224		1.07		1.5171		1.3931
TITLE: Me [19 F] with my friend [19 M], not sure if I may have messed things up already. POST: Hello hello everybody. I hope this isn't too trivial of a question to ask on here, but I've been feeling a bit out of my depth when it comes to this situation (I've had only one relationship before, and for many reasons, it was out of the ordinary). Okay! So, a couple of weeks ago, I started talking to …	relationships	A girl met a guy on Facebook, they hung out a few times as friends, he came over to her dorm room after she suggested hanging out one night, she made a move on him, they hooked up but didn't have sex, then the next time they hung out they did have sex. He said he doesn't want to put a label on their relationship yet and she's worried she may have messed things up by sleeping with him too soon.	5	I really like this guy, but after having sex with him after only knowing him for a very brief period of time, I am worried that I may have ruined my chances of a relationship with him.	4	Started talking to a guy on Facebook, hung out twice, slept together once, wondering if this means he might actually be interested in me. Not interested in fwb-type situations. Halp!	4	Started talking to a guy online, hung out twice, slept together twice, wondering if he might actually be interested in me or if I've ruined my chances already. Please help! I've never done anything like this before! I've never even kissed	2
TITLE: My 11 year old sons friend died suddenly, his funeral is today and my son suddenly doesn't want to attend. POST: **repost from relationships** A couple of weeks ago my sons friend died in a freak accident, it was completely shocking and horrific. He isn't aware of the details, but we broke the news to him as soon as we found out and have spoke about it many times with him. He has cried abo…	Parenting	My 11-year-old son's friend died suddenly and his funeral is today. My son doesn't want to attend and I don't know what to do. Should I push him or let him decide?	6	Sons good friend died and his funeral is today. Son was always wanting to go until today. Do I push him to go, or let him skip it?	5	11 year old son of mine has recently lost a friend unexpectedly, funeral is today and he suddenly doesn't want to go. Don't know what to do. Advice, please?	6	11 year old son of mine has recently lost a friend unexpectedly, funeral is today and he suddenly doesn't want to go. What do I do?	6
TITLE: The girl [26 F] I [22 M] have been seeing for a month didn't respond to me at all yesterday while hanging out with a friend [~30? M]. POST: She gets terrible service while at her house, but I texted her 3 times yesterday, 4-5 hours apart. She didn't call me until early this morning and left a voicemail that she was busy all day with a friend who showed up out of the blue. I saw that she po…	relationships	OP is upset because girl he's seeing didn't respond for 24 hours while hanging out with a friend. She later left a voicemail saying she was busy all day. OP saw a picture of her and the friend on Facebook before she responded.	6	Girl I'm seeing didn't respond to my texts while hanging out with a friend, what should I do, if anything?	5	Girl I've been seeing for a month didn't respond to any of my texts for 4-5 hours yesterday while hanging out with a friend. Am I wrong to be annoyed by this?	4	Girl I've been seeing for a month didn't respond to any of my texts until 24 hours after sending them. Am I wrong to be annoyed by this? Should I continue seeing her? Should I end things now before things get worse?	3
TITLE: TIFU by accidently kicking an old woman POST: So this didn't happen today but actually about a year or two ago. I was at my granddads funeral so of course it was all very sad and full of lots of crying old people. After the ceremony everyone walks outside the building and onto the other side of the small road the hearses drive down. Now the road is important because obviously if there's a …	tifu	At his granddad's funeral, an old woman falls while trying to walk up a curb. The author, an avid soccer player, instinctively sticks his foot out to control her fall, but it looks like he kicked her in the face. Her nose turns grey/black, but it turns out to be shoe polish from his shoe.	6	Tried to stop an old lady falling, kicked her in the face, made her look like she'd been 3 rounds with Mike Tyson	3	kicked an old woman square in the face while she was down because i thought it looked funny	2	kicked an old woman square in the face while she was down after accidentally kicking her shoe polish off her nose during a funeral	3
TITLE: I [32 M] found out my wife [31 F] had an affair a year and a half ago, now I can't stop thinking about other women. POST: Wife and I moved accross the country with our two daughters <our dream. We settle in, happy, rosey veiws, living the dream or so I though. 6mo later she sleeps with a co-worker. I find out about it four months later on my birthday. Shit hits the fan at home and work - s…	relationships	Husband found out about wife's affair 18 months ago and is now considering whether to have an affair himself or leave his wife for the sake of his children.	3	Wife Cheats on me but I stuck around for kids. I want out - do I have an affair or break it off and ruin my kids world?	5	Wife slept with co-worker a year ago - now I want out - do I pursue an "affair" or just flip the world upside down my kids and leave?	5	Wife slept with co-worker a year ago - now I want out - do I pursue an affair or leave the kids behind? I've never cheated before - but I've always fantasized about other women. What do I do?	5
TITLE: Caffeine addiction. Anyone taking vitamins or supplements with caffeine? POST: I have a horrible caffeine addiction, and I don't like sacrificing any of my daily calories for coffee. I used to drink 5-6 Diet Dr. Peppers a day, but I have switched to almost exclusively drinking only water most days. I do have a Diet Dr. Pepper occasionally, and I know that technically it's okay to probably …	loseit	Poster has a caffeine addiction and is looking for a supplement or vitamin with caffeine. Found One A Day Adult Vitacraves Gummies with Energy Support, but it's expensive. Asks if anyone has a better option.	6	The vitamin with caffeine I'm taking is on the expensive side, and I'm a self-proclaimed tightwad. Anyone have better options?	4	I have a caffeine addiction and need a better caffeine supplement than the one I found at the vitamin aisle. Anyone have any suggestions?	4	I have a caffeine addiction and need caffeine supplements or vitamins to help me stay awake and healthy. Anyone have any suggestions? I've tried everything I can think of. I've tried caffeine pills, caffeine gels, caffeine drinks, caffeine pills mixed with	2
TITLE: TIFU by eating a banana. POST: So, this actually happened yesterday. I am currently studying abroad in a tropical country. As a result, the selection of locally grown fruit is phenomenal. Now, I'm not usually one for bananas, but I keeping hearing they are much more flavorful here, so I decided I'd give it a go and bought a small bunch from the local market. Yesterday morning, I decided I'…	tifu	Person ate a banana and had an allergic reaction, causing a day of terrible symptoms including indigestion, acid reflux, sneezing fits, rash, and swelling. They eventually realized they had a banana allergy and took benedryl to alleviate the symptoms.	5	I don't usually eat bananas, but decided to have one for breakfast since I'm studying abroad in a tropical country and the bananas are supposedly better here, unaware that I am apparently highly allergic. Paid an accordingly hefty price.	3	I ate a banana, developed a rash, sneezed all over myself, and now have a banana allergy. No more bananas. Ever. Ever. Ever. Ever. Ever. Ever. Ever. Ever.	2	I ate a banana yesterday morning, developed a rash, sneezed all day, and now have a banana allergy. No more bananas. Ever. I hope you enjoyed reading this as much as I enjoyed writing it.	2
TITLE: Me [16F] have been dating my bf [16M] for 2 years and have not done anything sexually yet, is this alright? POST: Hi guy's I just need some advice to calm my nerves. So I have been dating this guy for 2 years since we were the age of 14. The most we have done is make out and cuddle, that's it nothing more. We are only 16 and I was wondering is it a bad thing we have not done anything sexua…	relationships	16-year-old girl wonders if it's okay that she and boyfriend haven't had sex despite dating for 2 years. Seeks advice without wanting to mess up the relationship.	5	Have been dating my Bf since the age of 14, we have not done anything except make out and cuddle. Is this alright or does it hurt the relationship long term?	5	Been dating this guy for 2 years, have not done anything sexually yet, is this alright or should I break it off before it gets worse?	4	Been dating this guy for 2 years, haven't done anything sexually yet, is this alright or bad? And if so how long should I wait before doing so? (I am 16)	4
TITLE: My fellow redditors! Within reason.. turn your ridiculous ideas into porn! POST: Soo there isn't a question in the headline.. How about.. Reddit, what kind of porn would you make if you could? Be respectful. I may be a whore, but I'm a human being above all else! I am in the process of developing a website for my alter ego porn star. I've decided that aside from all the normal boring porn …	AskReddit	Person is developing a website for their alter ego porn star and asks fellow redditors to share their ideas for memorable pornos, within reason and with respect. They share some of their own ideas, including scenarios involving a morgue and super heroes. The person offers to send a free copy of the production to anyone whose idea gets turned into a real porn.	3	If you can think of a good idea(retarded OR reasonable) for a film on my site and we film it, you will get a free DVD copy.	3	I need ideas for porn that would be awesome to see if you could make it. I will send you a free copy if your idea is awesome enough!	5	I need ideas for porn that would be memorable and unique enough to be turned into a movie or short clip. I will send you a free copy if your idea is chosen! I will also send you a link to the movie if your idea is chosen	3
TITLE: Me [18M] questioning if I should ask out my friend [17F] POST: Ok so perhaps this isn't the most dramatic thing you have seen on this subreddit but I feel like I'm stuck. I have been friends with this girl for a while now asking her and things were going great until I asked her to prom. I am hoping this will be a great night however ever since I asked her a couple weeks ago I find I can no…	relationships	Guy wondering if he should ask out his friend after awkward prom proposal.	4	Asked a girl (Friend) I like to prom and now our interactions are awkward. To ask her out or not to ask her out?	5	Started talking to a girl, asked her to prom, now find myself unable to talk to her due to awkwardness. Should I ask her out or give up	6	Started talking to girl alot more than usual after asking her to prom. Started getting awkward conversations and now wondering if she saw too much into the proposal. Should I ask her out or give up? Im not sure	6
TITLE: Cock blocked by a friend (Who's a girl). POST: So for the past week there's been this girl in one of my classes I've been talking to, she's pretty cute (dyed red hair, fair skin, a few freckles, not ginger), she loves star wars and I suspect she's a redditor. I was going to ask her for her number today, but a girl i met about a year ago came and sat right where the red head had been sittin…	AskReddit	Wanted to ask out a girl in his class, but a friend (also a girl) sat next to her and ruined his chance. Looking for advice.	5	Redhead in one of my classes was driven away by a girl I met a year ago, need advice on rekindling my chances with redhead.	5	Girl in class has been cock blocking me for the past week, now another girl has taken her place. Has anybody been in this situation before? Advice?	2	Girl in class cock-blocks me by sitting next to another girl who seems interested in me (who's also a girl). Has anybody been in this situation before? Advice?	2
TITLE: Wife's "friend" is stealing money. Any ideas on how to approach this? POST: So my wife has a friend that I will call Julie. My wife and Julie have been friends for about 6 years if I remember correctly. Julie is a shit friend in my opinion and I have told the wife my feelings. When they lived together Julie would start physical fights with my wife and spat on my wife's face once. Now when …	AskReddit	Wife's friend (Julie) is a bad friend who steals money. Noticed money missing after Julie was alone, and also paid for her car battery. Unsure whether to confront Julie or let wife handle it.	5	My wife's "friend" is a 2 faced stealing worthless bitch. Do I say something or let the wife continue to handle it?	7	Wife's friend is stealing money from us and leaving dirty clothes all over our house. Wife has no other friends in town so wife doesn't want to kick her out. Wife's friend is stealing from us and leaving dirty clothes all over our	4	Wife's friend is stealing money from us and leaving dirty clothes all over our house. Wife is trying to figure out if it is time to say something or let the wife handle it?	4
TITLE: TIFU bY brushing with Baking Soda without learning how to do it correctly. POST: Always wanted White Teeth but never visited the dentist since I was 8 due to fear [gotten bad experience as a kid]. So I heard that baking soda makes your teeth white if you brush your teeth with it. What I didn't get from all the reading, is that though it is supposed to be made into a paste, it shouldn't sti…	tifu	TIFU by brushing with gritty baking soda paste for months to whiten teeth, causing gum irritation and eventually brushing out a chunk of gum. Lesson learned: make sure baking soda paste is not gritty when brushing.	4	Brush Teeth with Baking Soda without research, physical brushed my gum OUT and away from Teeth, part of Gum is gone.	3	Baking soda paste brushed out of my teeth, it is not visible unless I smile too big, so please, always make sure the paste is not gritty.	3	Baking soda paste brushed out of teeth after brushing for months, resulting in gum loss and permanent white teeth. Don't brush baking soda paste with your teeth unless you know how to do it properly. TL;	3
TITLE: Me [27M] with [27F] was she the one that got away? POST: Basically this is just something that has been bugging me for a while and want to know what you guys think. I met this girl Cara when I was in college. We were both in long distance relationships throughout college so we never dated, but I flirted my dardnest with her. Fast forward to graduation, I end up breaking up with my LDR and …	relationships	A guy met a girl in college, but they were both in long distance relationships so they never dated. After graduation, they stayed in touch and had a great night out together, but she was engaged at the time. They hung out again a couple days later and watched fireworks, but he didn't make a move. Now she's married and he wonders if he messed up.	4	Had a good friend that was engaged and about to move away. Hung out two times before she left, I got the vibe, but didn't make a move. Should I have?	4	Met a girl at college, she moved away for grad school, we end up hanging out a lot after graduation, she gets engaged, we end up getting married. Did I fuck up? Did I miss my chance? Did I fuck up by not	2	Met a girl at college, she moved away for grad school, we end up hanging out twice after breaking up long distance relationship twice before she moved away. Did I fuck up? Did she just not want to make things weird? Did she just not	2
TITLE: My dad's in the hospital, again. Need to vent a bit. POST: My dad just turned 83 last week. The (sort of) short version of the chain of events is this. Last year he fell in the shower then didn't go to the doctor. For about the next 3 days he got weaker and more tired. He started hallucinating (seeing his dead brother in the room, etc.) so my mom got him to the hospital. He had lost a lot …	offmychest	The poster's dad, who is 83 years old, has been in and out of the hospital for various health issues, including internal bleeding and infections. The poster is worried that his dad doesn't have much time left, and is not ready to lose him. The post is a vent and the poster is not looking for advice.	5	My 83 year old dad is in the hospital for the 3rd time this year, and I'm worried about how much longer he's going to be around.	3	My dad is in the hospital again after falling in the shower last year and hallucinating for 3 days. He's getting weaker every day and I'm starting to worry that he won't make it. Not looking for comments or advice, just needed somewhere	6	My dad is getting worse and worse every time he goes back to the hospital for whatever reason. He's getting older and getting weaker every time he goes back. Not ready to let go yet. Not ready to let go yet. Not ready to let	6
TITLE: Advice for dealing with a non-binding HOA and restrictive covenants. POST: I posted this over in advice, but I only got one response, so I'm trying here... A neighbor of mine received a letter in the mail today stating that the HOA was taking action against him for keeping chickens on his property. The letter arrived normal post, and it described that keeping a chicken coop was against the…	AskReddit	Neighbor received a letter from non-binding HOA for keeping chickens. HOA cites covenant from 35 years ago, but zoning department says covenant is too old to enforce. Looking for advice on how to proceed. The neighbor has eight chickens, and many other neighbors keep small flocks of chickens. They do not pay dues to the HOA.	4	The non-binding HOA is threatening to bring one of my neighbors to court because he is keeping 8 chickens in his backyard. The covenant that they are applying is old and vague. What should we do?	4	Neighbor received letter stating that he violated covenants on deed for neighborhood property. He is considering taking legal action but unsure how to proceed. Any advice is welcome!	5	Neighbor received letter stating that he violated covenants on deed for neighborhood property. He is considering taking legal action but unsure how to proceed. Any advice is appreciated!	5
TITLE: Why does my (24F) boyfriend (25M) of four months make these kinds of comments to me? POST: I know we are all human here, and we all find people attractive. I'm happy to discuss beautiful people with my SO, but over the last few days a few comments just seem unnecessary. Why do you find it necessary to tell me that you like the way some reality show girl moved her mouth, ("Ooo, I like THAT.…	relationships	OP is uncomfortable with her boyfriend's recent comments about other women and his behavior towards her. She wonders if it's a sign of their relationship becoming too comfortable or if it's a typical behavior of some guys. She's unsure whether to distance herself or if she's just projecting her own insecurity.	3	After 4 months of dating I've noticed my boyfriend making frequent-er sexual comments about other women and acting more playful than sexy with me.	4	My boyfriend makes comments that make me uncomfortable, even though I know they are harmless. Is this normal for guys to do? Or am I projecting my own insecurity?	6	My boyfriend makes comments that make me uncomfortable, especially when discussing attractive people. Is this normal? Is he just comfortable or am I projecting my own insecurity? Is this just a sign of sloppiness? Is distance a good idea? What can I	4
TITLE: TIFU by emptying the vacuum POST: So my wife and I are adopting two kittens today and have been preparing the kitten room, cleaning thoroughly and setting everything up. Vacuuming was my job, and I was doing a damn good job (IMO). I should inform you that we have one of those Dyson Cyclone vacuums that has the cylinder that you detach and then press the button to empty from the bottom. So …	tifu	The poster emptied their Dyson vacuum and accidentally spilled the contents on the floor while preparing a room for newly adopted kittens.	4	Tried to empty vacuum into garbage bag, emptied onto floor and garbage bag instead, cleaned up, vacuum tipped the garbage over and emptied the rest of it, had to do it again. I need a shower and a drink.	2	Vacuumed the room, vacuumed the floor, vacuumed the floor again, vacuumed the floor again...and spilled the contents of the vacuum on the floor. I swear I am not making this up. I am so embarrassed.	3	Vacuumed the room, vacuumed the floor, vacuumed the floor again, vacuumed the floor AGAIN...and spilled the contents of the vacuum onto the floor. Now I have to buy a new one. Oh well. TL;	3
TITLE: $200 phone bill in one night POST: So I lost my phone for a few weeks, then yesterday I found it. I looked up my plan and had 5gbs of data left and two days in my plan. I didn't want to waste it so I googled how much data streaming a movie would take and it said 1-3gbs so I decided to use my phone as a hotspot and watch I'm Still Here on Netflix. Woke up in the morning to a $150 fee added …	personalfinance	Lost phone found with 5gb data left, used hotspot to watch a movie, woke up to $150 extra on phone bill, complained to phone company and got half the bill knocked off, frustrated with automatic over-data charges and lack of notification, wondering if can do anything about it or just pay the bill.	4	went 2gbs over the data on my phone plan and got charged $150 before I was informed I was even halfway through my data.	5	Lost phone for a few weeks, used it as a hotspot to watch Netflix, got charged $150 for using 7gbs instead of 5gbs. Watched movie for $40, $150 bill added. Watched movie for $40	3	Lost phone for weeks, used hotspot to watch Netflix, got charged $150 instead of $10 1gb data pack even though I only used 7gb total. Watched movie for $40 total including $150 fee. Watched movie for $	3
TITLE: Me [19M] Just discovered that my GF [19] has been lying to me about our long distance relationship. POST: Be sure to explain in detail with line breaks. I live in Oregon, she's attending school on campus in Utah, but lived in Oregon. I visit her once a month for about a week. Last visit (march 31-apr6) she was super distant and snappy towards me, I brushed it off assuming she was stressed …	relationships	Long-distance boyfriend discovers his girlfriend lied to him after the mutual friend revealed she spent three nights with another guy. He plans to confront her.	6	I live in OR she goes to college in Utah approaching one year and she wants to take a break, later find out she's been seeing another more distinguished man.	5	GF of almost one year has been lying to me about our long distance relationship, Facetiming a boy genius who owns his own business at 21 years old. Don't know how to handle this situation.	6	My GF of almost one year has been lying to me about our long distance relationship and Facetiming our mutual friend while she was working late one night. What do I do?	5
TITLE: I know this is going to sound selfish, but I'm going through a pretty rough time myself too, and I need to vent. POST: I'm sorry that this is just another one of those tired old sob stories on AskReddit, but I think that I've reached a point that I can no longer keep this all in. I'm a 26-year-old postgrad with a BA in Political Science from the University of Miami, and it's been incredibl…	AskReddit	A postgrad with a BA in Political Science is struggling to find a job and may not be able to pay rent or afford a plane ticket to visit family for Christmas. They are also experiencing depression and running out of medication. They have tried different drugs in the past and are currently taking several. They want to be productive but don't know where to turn next.	4	I just graduated, suffered immense problems with depression throughout my life, my healthcare provider just dropped me, I'm broke, and I just want to see my baby brother for Christmas.	5	I've been depressed for years, but I've been unable to find work for the past few months due to financial issues. I need help finding a way to be productive with my life. Please help me.	6	I've been struggling to find work for the past few months and I need some advice on how to get back on track and start contributing to society again. I've tried therapy, medication, and counseling, but nothing seems to work. I	6
TITLE: Me [24 M] interested in a university coursemate [22F] over the last 10 weeks, how do I ask her out? POST: I'm a uni student, and every monday I take this particular 3 hour module. Now there's this girl in the course, which we shall call Mandy, who is very active in class. The particular course is a gender studies-related course, but her responses in class have set her apart from the other …	relationships	A university student wants to ask out a girl in his class before the course ends, but he doesn't know how to do it as he hasn't found the right opportunity to get closer to her.	5	How do I ask out a girl that I only see for 3 hours a week in class and that I don't know too well?	6	Interested in a girl in class, but haven't had an opportunity to ask her out yet. Need help getting closer to her before the end of the course. Please help!	6	Interested in a girl in class, but she doesn't seem interested in me back yet. How do I ask her out before the end of the course without scaring her off? I've tried asking her out before but she didn't seem interested	4
TITLE: [23/f] American girl studying abroad just started a sexual relationship with a [25/m] Chinese boy. Need advice! POST: So, I am an American student studying Chinese language at a university in China. I met a grad student here majoring in English and we really hit it off, right from the day we met. I am a rather bold, outgoing girl who was raised in the New Jersey/New York area. He is from a…	relationship_advice	An American student studying in China is in a sexual relationship with a Chinese grad student. The Chinese boy is self-conscious and over-thinks during romantic liaisons, which is affecting their sex life. The girl is looking for advice on how to help him let go of his worries and enjoy himself.	5	Chinese boy I am in a sexual relationship with has difficulties with self-image and not worrying in sexual situations. How can I help him?	4	Met a Chinese boy studying English language abroad. Started a sexual relationship with him. Need advice on how to help him relax and enjoy himself without worrying about appearances or his lack of experience. Also, how to help him relax and enjoy himself	5	Met a Chinese boy studying English language abroad. Started dating him after a few months of dating each other. He is self conscious and over-think during our sexual encounters. Need help! (I am an American girl studying Chinese language	5
TITLE: TIFU by making fun of my co-workers dead baby. POST: I won't make this too long but basically at my job we all like to fuck with each other a lot. I have two co workers named Chris and Jeff who have pregnant girlfriends. We were on the conversation of sex and I said to Chris "Ha you can't fuck your girl cause she's pregnant." (yes I know you can still fuck your girlfriend if she's pregnant…	tifu	OP made a joke about his coworkers' pregnant girlfriends, including one that had lost their baby, causing them to feel heartbroken. OP later apologized and the coworker wasn't too upset.	3	Joking around at work told co worker he couldn't fuck his girlfriend cause she was pregnant. Turns out she lost the baby.	4	Made fun of co-workers dead baby because they had a baby and I thought it was funny. They assumed everyone else told me so they assumed I was making fun of them too. They assumed I was making fun of them too.	2	Made fun of co-workers dead baby cause they lost the baby. They assumed everyone else told me so they assumed everyone else was telling me too. They assumed everyone else was telling me too so they assumed everyone else was telling me too. It could	2
TITLE: Is she [21] playing hard to get or uninterested in me?[22/M] POST: Hey guys first post here. So I'll try to make this quick, I've been out of the dating scene for a few years now and need advice with a girl i currently like. Her and I met in class and have been talking for not too long a month or so. We have tons in common I have gotten her number and we text every now and then (more on th…	relationships	A guy is interested in a girl from his class and has been talking and hanging out with her for a month. They have similar interests and seem to hit it off, but she seems less interested in him after they hung out and they don't text as much. He wonders if she is playing hard to get or uninterested.	4	hit it off with a girl. After 'study date' that went well communication/interest dropped off a bit. She uninterested playing hard to get or other?	5	Started talking to girl. Started hitting it off. Started hanging out more often than usual. Started texting less often than usual. Started acting different than usual. Is she playing hard to get or uninterested in me?	6	Started talking to girl recently she seems more interested in other people than me but acts like she likes me still sometimes. Is she playing hard to get or uninterested in me? Or other? Or am I just over thinking everything? I need some insight	5
TITLE: None of my business? Boyfriend of two years has decided to build a house and hasn't asked me for any input. (F27)(M28) POST: I'm feeling really hurt. My boyfriend (M28) and I (F27) have been in a serious relationship for two years. Everything's been wonderful and I'm very happy. However, we're still not living together because he's "not ready yet." There's really no reason why we can't liv…	relationships	Boyfriend of 2 years plans to build a house without asking for input. F27 is hurt and wonders if she should have had some say.	3	Boyfriend hasn't asked for any input in regards to his new home. I feel hurt because I think it's something we should be doing together.	4	Boyfriend of two years has decided to build a house and hasn't asked me for any input. Is this any of my business? Am I overreacting?	3	Boyfriend of two years hasn't asked me for input on building a future house and hasn't discussed any of this with me. Is this any of my business? Is this normal? Am I overreacting? What should I do? (F	3
TITLE: I [24M] tried to remain friends with ex-girlfriend [22F]. Her new boyfriend [21M] has insisted she stop talking to me. POST: Broke up with my girlfriend earlier this year around February because we didn't feel like things were working out (1.5 years together). I was in a bad state and wasn't sure if I wanted to take the relationship any further. That said she is a fantastic person and I wa…	relationships	A guy's ex-girlfriend's new boyfriend has made her stop talking to him and has been checking her phone and blocking him on social media. The guy wants to remain friends with her but is unsure how to handle the situation.	6	Trying to remain friends with ex-girlfriend. New boyfriend wants her to stop talking to me, keeps taking her phone to make sure she isn't.	7	Ex-girlfriend has new boyfriend who is trying to control her life and has blocked me on social media multiple times. Don't know what to do.	6	Ex-girlfriend has new boyfriend who insists she stop talking to me after she stated getting serious with another guy. Don't know what to do. Don't want to lose her as a friend though. What do I do?	5
TITLE: Parents will probably be against my[25f] relationship with my boyfriend[26M] POST: My boyfriend and I have been in a relationship for nearly 2 years and last year it turned into a long distance relationship. Meanwhile we have come to the conclusion, that we want to live in the same country and move in together. My family expects me to get married in order to live with my boyfriend. My boyf…	relationships	A woman wants to tell her parents about her boyfriend but is afraid they will disapprove because of cultural differences. She is worried about causing conflict and needs advice on how to handle the conversation.	6	I want to tell my conservative parents about my boyfriend. They will probably be against him because of cultural differences. I hope for advice on how to handle the conversation to keep the atmosphere at home as peaceful as possible.	6	My parents will probably disown me if I tell them about my boyfriend. I really want to tell them but I am afraid of the consequences. What can I do to make this conversation easier for both of us?	6	Parents might be against my boyfriend because of cultural differences and cultural differences might cause a conflict between us. I want to tell them about him but I am afraid that will cause a conflict between us. What should I do? What should I say? What	5
TITLE: Black people. Help me understand you. POST: Don't read if you think this is a troll or angry statement because it's not, it's a genuine statement. Please. I have tried many times to understand why black people feel so entitled because of tragic acts that happened hundreds of years ago. (Since when were black people the only slaves?) Every SINGLE black man/woman I've met, has this particula…	AskReddit	A person asks for help to understand why black people have a sense of entitlement due to tragic acts from hundreds of years ago, and why they believe every other race hates and oppresses them. They also question when black people will be satisfied with efforts to embrace them in society.	3	Black people "take" a lot and rarely "give" They want it all but when it comes to embracing the other races they don't want to. Why is this?	4	Black people always have this attitude that blacks need to stick together no matter what. Why do you think this is so? What can be done to change this attitude?	3	Black people always seem to be complaining about everything, even though they are the ones who created most of the problems in society today. What are you doing to make it better?	3
TITLE: Sometimes I(21F) think my bf(24M) chooses games over me... POST: ...and it is really starting to upset me. We've been dating for a while, I knew he was a gamer and that was part of the appeal. But I'm finding it more and more annoying when he ignores me to talk to people he's never met. I'm right here, in flesh and blood, trying to talk about my day or my problems or wanting some sexy time…	relationships	Post about a girl feeling neglected by her gamer boyfriend who chooses to play games and talk to online friends instead of spending time with her, even in intimate moments.	5	I feel like my bf ignores me all the time to play video games and it's starting to really bother me. Am I in the wrong?	5	Sometimes I feel like my bf chooses games over me when we're apart most of the day. Is this normal? Is this a deal breaker for you? Or am I just overreacting?	5	Sometimes I feel like my bf chooses games over me when we're apart most of the day. Is this normal? Or am I just being clingy? I love him dearly but sometimes I just want some attention from him. I just want some	5
TITLE: I though the date went well, she didn't. POST: I [24M] met a nice girl [22F] on Tinder last week, though I don't hold much stock in Tinder. I got her number and we texted all week, and we seemed to get a long very well. So We decided to meet for drinks on Friday, it just so happened to be my birthday too. I haven't been on a date like this in a while so I was nervous but I do well under pr…	dating_advice	A man went on a date with a girl he met on Tinder, thought it went well, but she later told him it was bad and unmatched him on the app without explaining why. He is upset and wants to learn from his mistakes.	5	Met a girl, date went well (so I though), she said it didn't go well, she's done with me.	3	Went on a date with a girl I met on Tinder, things went well, but she rejected me on Tinder. Not sure what to do now. Anybody else deal with this? Any ideas?	6	Went on date with girl, things went well, she didn't like some things I said so she rejected me on Tinder. Not trying to fix anything, just want to learn from my mistakes. Anybody else deal with this? Any ideas? Im	6
TITLE: is it possible to get in trouble for telling someone to die in a fire? POST: long story short some dick sold me a fake Pokemon game on play.com. I emailed him calling him a douche for distributing fakes and said die in a fire. I left a review on his seller profile saying I received a fake game. he emails me saying I threatened to burn his house down (?????) and that if I did not say sorry …	AskReddit	The person bought a fake Pokemon game online and called the seller a douche and told them to "die in a fire." The seller threatens to call the police if they don't apologize and remove their negative feedback. The person refuses and the seller threatens to send the police to their house.	2	can I get in trouble for telling someone who sold me a fake Pokemon game to die in a fire? since he's saying I want to burn his house down.	3	ive been threatened by a seller on play.com for telling him to die in a fire. ive never threatened anyone before so idk if its legal to do so	3	ive been threatened by someone selling fake games on play.com and told to die in a fire by emailing them	3
TITLE: Should I (M19) drop this girl (F20)...? POST: Hello, This girl I met has been hitting on me for a while and I'm interested. However, today she said something that really bothered me. I told her I can't really cook and have much to learn and she asked me in a b**chy way how am I supposed to impress a woman if I can't cook.... I told her I was joking ( I can cook but have limited knowledge.)…	relationships	OP is considering dropping a girl he's interested in after she made a rude comment about his cooking.	4	Girl was rude to me and said I can't impress a woman without being able to cook, meanwhile she stated she can't cook well herself.	4	Girl I like is super rude to me when texting and seems to be hinting at some serious problems in our future... Should I drop her or wait for the right time to ask her out?	4	Girl hit on me today, told me she can't cook well and asked me how am I supposed to impress a woman if I can't cook.... Should I drop her or continue talking to her? I really like her though... TL;DR	4
TITLE: BF [23 M] broke up with me [22 F] after two years together, it was somewhat mutual POST: This happened yesterday, and we're both still in love with each other. We both love each other so deeply, but are at different stages in life. (he's finishing up college, I graduated in May) We were in a weird phase where I was commuting to work a shitty job and staying with him for half the week, and …	relationships	Couple in love broke up due to being at different stages in life and distance issues, but still care for each other and are unsure of what to do next.	2	Bf of two years ended our strong relationship because it's for the best, but he still loves me. Not sure how to move on.	4	Long distance boyfriend broke up with me yesterday after two years together, mutual breakup seems inevitable. Need some advice on how to move on and not let this affect our future together.	4	Boyfriend of 2 years broke up with me yesterday after realizing long distance would be too hard. We still love each other dearly though. What do we do now? We still love each other dearly though. What do we do now? We still love	4
TITLE: Hey Reddit, I've got very severe lower back/sciatic nerve pain. Any tips/tricks/help from fellow redditors? POST: So here's basically what's going on: I hurt my back about 4 weeks ago by carrying around 50 pounds in a messenger bag slung sideways over my shoulder. I am having very severe and crippling pain which has moved almost 90% from my lower back down into my buttocks/hamstrings. I am…	AskReddit	The poster has severe lower back and sciatic nerve pain and is seeking advice from fellow redditors. They have tried physical therapy, muscle stimulation, ice, Advil, rest, and using pillows under their legs and back. They are in constant pain and are unable to move, sleep, or stand for more than 15 minutes at a time. They are also starting university soon and are worried about how they will mana…	3	I have sciatic nerve pain thats awful and is constantly at 8 or 9/10 on the pain scale. Do you have any tips or helpful hints for me to ease the pain and make recover faster?	3	I hurt my back 4 weeks ago and have been in constant pain ever since. Anybody else have this problem and have any tips/tricks/help from fellow redditors? I really need some help.	5	I've got sciatica/lower back pain which is getting worse every day and I need help figuring out how to ease the pain and get back to normal. Anybody else have similar experiences or tips/tricks/help from fellow redditors	5
TITLE: My twin brother (24M) just came out of the closet and I'm worried about my parents (m&f50s) POST: Sorry if the formatting is weird I am submitting through mobile. As the title describes my brother is an out bisexual now. A little background: we come from a Hispanic Catholic family My parents are very traditional My twin brother likes men and women He has a boyfriend of 9ish months. We have…	relationships	A twin's brother has come out as bisexual to their traditional Hispanic Catholic family, which upset their mother greatly and caused health concerns. The poster feels helpless and doesn't know how to comfort their mother.	4	My twin came out as an open bisexual to my parents and my mom can't stop crying. I feel useless. I don't know what to do.	5	My brother came out as bisexual and now my parents are super upset and scaring me because they have had health problems in the past. I don't know how to help. I feel useless and scared. What can I do to help them through this	5	My brother came out as bisexual and now my parents are scaring the living shit out of me because they have never dealt with anything like this before. I don't know what to do. I love them dearly but I don't know what to do	5
TITLE: Me [27 M] with my [23 F] on/off gf of 1 year. I need to break up but my head and heart are conflicted. POST: I'll keep this brief. There are a lot of issues in the relationship. Big issues that arent going to resolve anytime soon, and are deal-breakers for me in the long-run. I realized not long ago that I need to let this relationship go. That said, she moved a long way to be with me, and…	relationships	A man is conflicted about breaking up with his girlfriend of one year due to big, unresolved issues, but doesn't want to leave her homeless since they have a lease together. He wants help finding the courage to end the relationship.	5	I need to break up with my gf but it hurts and I'm afraid of being miserable and alone again. What if I dont get another chance after this? I dont want to hurt her.	4	Need to end a long-term relationship but dont want to leave her homeless. Need to end the relationship but dont want to leave her alone.	4	Need to end a 1 year relationship but dont want to leave her homeless. Don't want to be an asshole either way. Don't want to be the reason she ends up homeless. Don't want to be the reason she ends up	4
TITLE: Being forced to be Catholic...what to do? POST: About two or three months ago, my mom divorced my dad and he moved out. The relationship had been bad for many years, so no suprise there (sadness, but no suprise). A coupla weeks later, her boyfriend, who she had been "just friends" with when she was still married to my dad, moved in. He is a devout Catholic, has been going to Mass every day…	AskReddit	After his mother's divorce, her devout Catholic boyfriend moved in and now forces the OP to attend mass every weekend and sign up for Catholic clubs and activities. The OP is not sure if he is an atheist and is unsure whether to confront his mother or keep putting up with it until he can move out.	4	My mother has been a devout Catholic ever since she met her new boyfriend after divorcing my dad. Now she's forcing me to be a devout Catholic too, against my will. What should I do?	5	Mom's Catholic boyfriend is forcing me to go to mass every weekend and sign up for all kinds of Catholic clubs and activities without asking me first. What do I do?	5	Mom divorces dad, moves in with Catholic boyfriend who insists on forcing me to attend Mass every weekend and participate in Catholic activities every week. What do?	5
TITLE: Stalker emails me, claims to be local, gives a crazy story, and then dies??? POST: Okay maybe this should be in WTF... I really just want some input or advice here. A while ago I got an email from a guy. Long story short he claimed to be a part of a secret organization and is a master hacker. He knew my class schedule and would give details about when I traveled where, and where he would w…	AskReddit	A stalker emails a person claiming to be part of a secret organization, a master hacker, and in love with them. The stalker knows personal information about the person and sends creepy messages. The person suspects the stalker may be their teacher and confronts them. The stalker claims to be leaving the country and hitching an illegal ride on a ship out of Seattle, and later the person receives a…	3	Guy claims to know me and love me, gives me story about being a secret agent or something than then mysteriously dies.	4	Guy claims to be part of a secret organization, gives me info about where he will watch me from, claims he loves me more than anyone ever could, dies suddenly, leaves me a note saying he hopes to meet me in heaven	5	Guy claims to be part of secret organization, gives me info about himself that is very similar to the person I suspect he is, claims he dies of heart attack, leaves me note saying he hopes to meet me in heaven	5
TITLE: Have any of had a successful, long-term relationship that began with glances across a room? POST: Met a potential client for coffee today in a public coffee shop. Passed a [re: gorgeous] guy putting sugar in his coffee, made eye contact, smiled, and continued to the counter to order my coffee. Then I joined my client-to-be and proceeded to discuss business with him for 45 minutes, all the …	AskReddit	Person meets attractive stranger in coffee shop, exchanges glances and smiles. Attractive stranger joins conversation for a minute, exchanges cards, and leaves. Person receives call and texts from attractive stranger later. Asks if anyone has had successful relationships that began similarly.	4	Saw a guy in a cafe, exchanged glances with him while otherwise occupied for an hour, he smoothly got my number anyway and now we have a date. Success stories?	5	Met a hot guy in a public coffee shop today. Started talking business with him for 45 minutes before he walked behind my client and exchanged cards with both of us. Had a successful first date! Have any of you had successful relationships that began this way	5	Met hot guy across a room today. Started talking business with him. Started getting feelings for him. Started getting feelings for hot guy across the room. Started dating hot guy across the room. Started dating hot guy across the room. Started dating hot guy	4
TITLE: Hey reddit, Have you been the cheater or "cheated" in a relationship? POST: Just over a year ago I found out that my bf had cheated on me. I decided to stay with him (bad idea?) because I really do love him. However, I can't seem to let it go. I don't bring it up in fights or anything, but I do find myself getting upset over it every now and then. I have asked him why he did it, and the re…	AskReddit	OP is struggling to move on after finding out their boyfriend cheated on them over a year ago. Asks cheaters how it makes them feel when their partner won't let it go and the cheated if they still find themselves upset.	4	how does it make you feel when your SO can't get over cheating, do you find yourself still thinking of it.	5	I cheated on my bf of 1 year, he forgave me but still finds himself thinking about it occasionally. Do you still find yourself thinking about it or do you forgive him completely?	3	Been cheated on in the past year, still find myself getting upset over it every now and then even though SO says he doesn't know why he did it. Has anyone else been cheated on or cheated on in the past year and found themselves thinking about	3
TITLE: 16M Having troubles with some insecurities, need some advice POST: I'm on mobile at the moment so I can't tag, but I possibly can in the morning. I've been cheated on 3 times by 3 separate girlfriends in the past 10 months. Now I am over each one of them specifically, but it's developed some trust issues and I worry a lot now that I am in another relationship. Whenever I see my girlfriend …	relationships	A 16-year-old boy is seeking advice on how to deal with trust issues and insecurities caused by being cheated on by three separate girlfriends within the past 10 months. He worries when his current girlfriend talks to other guys and feels nervous when she goes on dance trips. He seeks advice on how to deal with his insecurities so he can maintain a healthy relationship.	4	Been cheated on a few times, nervous it will happen again, and seeing her talk to other guys bothers me significantly, how to get rid of these insecurities?	5	I've been cheated on 3 times in the past 10 months and have some insecurities that are killing me because I know it's unlikely that attraction is there between us. Need some advice on how to overcome these insecurities. Thanks guys.	5	I've been cheated on 3 times in 10 months by 3 different girls and now I'm in another relationship and these insecurities are killing me. I'd like some advice on how to stop worrying so much and just enjoy the time we have together	4
TITLE: My (20M) disinterest in sex is really hurting my girlfriend (19F) of 3 years POST: My girlfriend and I started as a long distance relationship when we were in high school. We met three times over the years, each time for about a week, before moving in together during the beginning of this year. Initially, our sex life was pretty great. We had sex all the time and everything was fine. Latel…	relationships	The poster is a 20-year-old male who is no longer interested in having sex with his 19-year-old girlfriend of 3 years. He experiences numbness during sex and it's causing his girlfriend to feel unattractive. He wants advice on how to fix this issue.	5	I don't really enjoy sex anymore, and it's having a serious effect on my girlfriend's self esteem. How can I make myself more interested?	6	My disinterest in sex is really hurting my girlfriend's self esteem and making her feel unattractive. I really just want some advice on how to fix this so that we can have more sex. Anybody have any suggestions as to how I can fix	5	My disinterest in sex is really hurting my girlfriend's self esteem and making her feel unattractive. What can I do to fix this? I love her dearly and want to make her happy. Anybody have any suggestions as to what I can do	5
TITLE: Child Labor Laws: No break and 8-hour shifts. POST: 16 year old, working at a fast food joint, around 21 hours a week for around the last 2 weeks. I live in Wyoming. Not once, whether it be a 5 or 8 hour shift, have gotten a break. Several (3) people have told me this is highly illegal. 1. At my former job, a certain Taco supplier, was strict on getting a 30 minute break in (even if it was…	legaladvice	A 16-year-old fast food worker in Wyoming has not received any breaks during 5-8 hour shifts over the past 2 weeks, which several people have told them is illegal. They are seeking advice on how to take action against their boss and are also concerned about their boss printing off their SS card in full color.	6	My gov. teacher said "What's the point of these labor laws if we, as citizens, are too afraid to say when they're broken?"	4	Working at fast food joint for 2 weeks, never gotten a break, boss claims I have received breaks when I have not. What can I do to protect myself from being fired for quitting without a break.	6	Working at fast food joint for 2 weeks straight, getting no breaks, boss claims she gives breaks, but never gives them. What can I do to stop this?	6
TITLE: I [F/21] feel like I really don't care about most people and I want to change that POST: I care about people in general, but when it comes down to individuals, I get so bored and annoyed with other people's lives. Most people don't genuinely care about how their cashier's day is going when they ask, but I feel like that about everybody, including my best friends. When my friends tell me st…	relationships	The person doesn't care about individual people's lives and struggles, including their friends, and wants to change that.	5	I have been losing interest in my friend's lives and it makes me feel really selfish. How can I start to care about them again?	5	I care about people's lives too much and it's making me feel narcissistic and selfish. I want to change that but don't know how. Anybody ever felt this way?	3	I care about people's lives too much and it's affecting my relationship with my boyfriend and making me feel narcissistic. Anybody ever felt like this? What did you do about it? How did you overcome it? Anybody have any tips for overcoming	3
TITLE: Reddit, do you think you're able to confront yourself and admit your insecurities? POST: Recently my cousin came to me with a proposition. He told me that I was living a facade because I was afraid of judgement. He told me I was hiding. Then he challenged me to a year of accountability with myself. Step one? Publicly admitting the things about myself that I've been running from. Facing the…	AskReddit	The poster's cousin challenged them to confront their insecurities and be accountable for them by publicly admitting them. They received positive feedback and want to know if others would like to join in.	5	I'm doing a challenge where I post my biggest insecurities and face them head on, and I'm asking reddit to join me.	5	I've been hiding things from myself for years and now I want to share them with the world so the people in my life can help me grow. Do you want to join me on this journey of accountability?	5	Cousin challenged me to publicly admit my insecurities so the people in my life can help me grow. I'm accepting submissions until Monday. Do you want to join me? Do you have any questions or comments? Please share! Thank you!	5
TITLE: I'll (24/M) will probably lose touch with my father (45/M) if we ever decide to move to separate places. POST: So my relationship with my father is a strained one with a long history of arguments, hurt feelings, neglect and guilt. Growing up lets just say he was a less than attentive father and I came to terms with it fairly quickly in life. My mother and father have been separated since I…	relationships	Man has a strained relationship with his father due to his neglect and favoritism towards his step family. They have bonded over car repair but the man feels that if they separate they will lose touch completely because of their weak relationship.	5	Father and I aren't all that close and I feel like when I leave to live my own life that we will never talk to each other again.	5	I'll probably lose touch with my father if we ever decide to move to separate places. Has anyone else been in this situation before and how did you handle it?	5	I'll probably lose touch with my father if we ever decide to move to separate places. I've accepted this already but it's still hard knowing that someday I'll probably forget about him and never see him again. What can I do to make this	5
TITLE: I [27 M] have "almost arguments" with my wife [28 F] about cleanliness of things and related topics. Reddit, am I just a slob, or is she being unreasonable or (medically) OCD? Looking for opinions. POST: So we've been married for quite a while, and get along famously on nearly everything. Except for one category, and that's the general sanitation level of things. We both like to keep an or…	relationships	A man is seeking opinions on whether his wife's cleanliness standards are unreasonable or if he is being too relaxed.	4	Based on the above examples, am I the dirty one or is she being a little obsessive? Is it worth confronting her about or just don't sweat the small stuff?	5	Wife acts like I'm crazy for putting jeans I've worn a few times back into a dresser drawer that I use for gym shorts and mostly clean things. Am I wrong for feeling this way or is she being unreasonable? Looking for opinions.	3	Wife acts like I'm crazy for putting jeans back into a dresser drawer after wearing them outside and sitting down places. Am I wrong for feeling this way or is she? What can I do to help? What can she do to help? What	3
TITLE: Me [21F] with [22M]. Can't tell if he's messing with me or just really weird/shy? POST: I've had a crush on this guy from my gym for the past 2 years. Long story short, I found out he was interested in me back in May and we started texting. We always planned to meet at the gym at the same time. He actually seemed pretty shy because he would never say hi to me at the gym first. I'd always h…	dating_advice	Woman has crush on guy from gym for 2 years, they start texting and have a good first date but he stops talking to her for no reason. They match on Tinder and talk briefly before he disappears again. He randomly texts her 2 days ago, says he's shy, sends a shirtless pic, and hugs her at the gym. She invites him to go out with her and friends but he doesn't respond. She's unsure if he's messing wi…	3	Dude is sending mixed signals. I can't tell if he's uninterested and just messing with me, or incredibly weird/shy/awkward.	4	Guy I've had a crush on for 2 years randomly stopped talking to me after our first date 2 weeks ago. Texted me today and said "Idk why I do or don't do things. I'm weird and just really shy."	5	Guy I've had a crush on for 2 years randomly stopped talking to me after our first date 2 weeks ago. Started talking again 2 days ago after matching on Tinder. Haven't heard from him since yesterday. Wat do?	5
TITLE: I [26 M] am uncomfortable with my girlfriend's [25F] Facebook pictures that include her ex. Is it fair ask her to take them down? POST: To provide more color, I find it uncomfortable when I randomly click on my girlfriend's Facebook pictures, because her ex is in about half of them. What makes it extra weird is that I knew the guy/was kind of friends with him at one point in time while the…	relationships	Man wants girlfriend to take down Facebook pictures with her ex.	4	Gf's FB pics of ex makes me feel uncomfortable, as it draws up images in my head. Can I ask her to take them down or am I blowing it out of proportion?	6	Girlfriend has pictures of her ex on Facebook that include him in half of them. Is it fair for me to ask her to take them down? Or am I overreacting and overreacting to the pictures themselves?	6	My girlfriend has pictures of her exes on Facebook that include them together. I find this uncomfortable and am uncomfortable with the pictures themselves. Is asking her to take them down reasonable? Or am I just being paranoid? What do you think? TL	5
TITLE: I(21f) feel like I'm unreasonably upset about something my (m21) did last night. POST: Last night I left the bar early with my friends because I was tired and bored. My boyfriend was there and had planned on leaving too and watching a movie with me. But he forgot about this when his friends told him they were coming to the bar we were at. He said he would stay only about 15 minutes then le…	relationships	Girlfriend upset at boyfriend for staying longer with a girl she doesn't like, going to his apartment with her, finding him and girl alone, while later finding out nothing happened, still feeling upset.	5	I still am kinda upset that my bf kinda ditched me to hang with his friends, then had this girl I don't like up to his room alone when we were making plans to spend the night	5	Bf stayed over at a sorority house with a girl friend who he knows I don't like and didnt tell me until after we made plans. Now I'm mad over nothing and don't know how to get over it.	5	Bf stayed an hour and a half after we agreed we would leave early because he forgot about his friends coming over. Now Im mad over nothing and feel unreasonable over nothing. How do I get over this?	5
TITLE: My sister's dog was picked up by animal control, $150 to get him out and she can't afford it. He'll be euthanized in 2 days if she doesn't pay up. POST: My sister has had this dog for the longest time, he's been shuffled around our family from time to time when she couldn't keep him due to being a renter. I had him for a year and had to give him back to her because I moved into a smaller p…	Pets	The poster's sister's dog was picked up by animal control and will be euthanized in two days if she can't pay $150 to get him out. The poster can't afford to help but doesn't want the dog to be put down. The dog is a sweet beagle named Brody.	6	My sisters dog got loose, put in doggy jail, and it will cost $150 to get him out, family can't afford to get him out, if he doesn't get out, he'll be put to sleep.	6	My sister's dog got out of her yard today and got locked up by animal control. She can't afford the $150 to get him out and he'll be put down if she doesn't pay up! :-( Please help :(	6	Sister's dog got out of yard today and animal control is going to put him down if she doesn't pay up. She can't afford the $150 fee :( What can I do :( Please help :( I love him dearly :	5
TITLE: [18/m] My friend's (18/f) boyfired (21/m) mite be 'covert emotional manipulating her' what do I do? POST: Okay so My friend lets call her Stacey. Stacey's boyfriend doesn't like her hanging out with her friends cause he gets jealous, and won't talk her to days if she does this. She missed important events like her sisters 21 birthday cause he didn't want her to go and get dressed up. They …	relationship_advice	The poster's friend's boyfriend is emotionally manipulating her by getting jealous, ignoring her, and controlling her actions. The friend is now depressed and anxious. The poster is unsure of what to do and is considering telling their friend that they think she is being manipulated.	5	My friend's bf won't let her hangout with others, she feels like poop, but loves him too much to break up w/ him. Idk how to human, how do I help her?	6	Friend's boyfriend is emotionally manipulative and controlling, even though he is mad at her sometimes....what do I do about this situation....and how can I help her....I really like her....	4	Friend's boyfriend is emotionally manipulative and controlling, she is depressed cause he gets mad if she hangs out with friends cause he gets jealous....she doesn't know what to do....help!	4
TITLE: Went on a date with a girl, felt like we hit it off. Now she tells me she's seeing someone. POST: I met a girl at my old job and I felt like we connected right away. She went on vacation and I transferred to another office in town. When she came back from her vacation she added me on Facebook and started messaging me. We started talking back and forth for a bit to the point where I felt co…	dating_advice	Went on a date with a girl, felt like they hit it off, but now she tells him she's seeing someone. He's confused and looking for advice on how to respond respectfully and move on.	6	Asked a girl out. Went 'really' well. Asked for a second date. Turns out she's seeing someone. Advice on how to respond?	6	Went on a date with a girl, felt like we hit it off. Now she tells me she's seeing someone. Need some advice on how to respond.	6	Went on date with girl, felt like we hit it off. Now she tells me she's seeing someone else. Don't want awkwardness or drama. What do?*	6
TITLE: I am covering for my friend's affair and hate it POST: I (28/f) have been friends with...let's call her Heidi (32/f)...for about a year. She is from Germany but has been married to an American man for about 5 years. She's absolutely miserable in her marriage but relies on her husband financially and also to stay here in the US. He's a strange guy but I like him and don't want to see him hu…	relationships	Friend in unhappy marriage is having an affair and using me as a cover-up, but I hate being the person to cover for her. Looking for advice.	5	My foreign friend is using me as a cover up for her affair but needs to keep it a secret from her husband for citizenship and financial reasons. I don't want to end up being the bad guy in all this.	6	Friend is having an affair with a stranger and using me as a "cover up". I hate being the person to cover for her and want to figure out how to stop this without causing more harm than good.	5	Friend is having an affair and using me as a cover up. I hate being the person to cover for her and want to help her. Anybody have any advice for me?	4
TITLE: Neighbor (12M) asked husband (33M) if he was gay during "Take Your Son To Work Day". Help me (30F) delicately approach this... POST: My husband and I (33M and 30F) have an awesome relationship with our downstairs neighbors. Two awesome boys in a single-mom household. Mom is great. My husband and I are sort've "the cool neighbors" that offer advice, help with homework, celebrate good grades…	relationships	Husband took neighbor boy to work day, neighbor boy asked husband if he was gay, husband was offended. Wife seeks advice on how to discuss with neighbor boy.	5	Husband (33M) took neighbor (12M) to "Take Your Son to Work Day". Neighbor embarrassed him and asked if husband was gay. How can I (30F) help?	5	Neighbor asked husband if he was gay during "Take Your Son to Work Day." Husband said no. Neighbor asked husband if he was gay during rugby tournament. Husband said no. Neighbor asked husband if he was gay during rugby tournament.	3	Neighbor asked husband if he was gay during "Take Your Son to Work Day." Husband told J no. Now husband is uncomfortable talking to J about the incident. How do I approach this tactfully?	4
TITLE: How do I explain my innocent situation that doesn't look innocent POST: hello I have found myself in a bit of a pickle. A couple months ago I found myself talking to a girl who is a camwhore on a website. she tells me she's never done it and wants to give me a free show. I respectfully decline cause I have a girlfriend but i continue talking to this camwhore cause I'm honestly curious what…	relationship_advice	A man talked to a camgirl out of curiosity, declined her offer for a free show, and maintained a professional conversation. The camgirl began texting him, asking him to watch her shows, and he rejected the offer. His girlfriend found the text and wants to talk to him about it. He needs advice on how to explain the situation.	4	camwhore texted me saying "so... wanna have some fun" and my girlfriend saw it. how do I explain???	5	ive been talking to a camwhore for months cause i'm curious what her life is like in that business. ive told her no twice now cause i have a girlfriend but she continues to text me asking me to come watch her	3	ive been talking to a camwhore cause i'm curious what her life is like in that business,she starts sending me messages,she starts asking me to come watch her,she starts sending me dirty pictures,she starts sending me dirty messages,	3
TITLE: I was looking through my phone contacts when I rediscovered a girl's phone number whom I started to hit it off with. What should I do? (More info inside) POST: Okay so I was looking through my phone contacts when I came across this girl's phone number (let's call her Abby for the sake of logic) and I haven't talked to her in a few years. We go to the same school and I haven't really talked…	dating_advice	The poster found a girl's number whom they hit it off with a few years ago, saw her at the dentist's office, and forgot to ask for her number. They found her number in their phone contacts and don't know whether to text her or wait to see her again.	5	Met a popular girl and forgot to ask for her number then found out I had her number but she may not remember she gave it to me in 7th grade. I DONT KNOW WHAT TO DO????	5	Found a girl's number who I hit it off with in 7th grade, forgot to ask for her number and found her again today when I saw her at the dentist office. What do I do now?	4	Found a girl's number through my phone contacts and hit it off with her. Now what? (More info inside)	3
TITLE: TIFU by not taking my glasses to my friends wedding. POST: So this happened yesterday. A friend of mine got married. I was supposed to be a groomsman in the wedding. One of the bridesmaids got sick and couldn't be in the wedding. The photographer didn't show up either. Perfect, Jon can take pictures. Perfect! I didn't want to be in the wedding anyway. I hadn't worn my glasses at all that d…	tifu	A friend's bridesmaid got sick and the photographer didn't show up, so the writer took pictures at the wedding without wearing glasses and all the photos turned out blurry. The friend didn't mind and laughed about it.	4	If you don't want to wear glasses to your friends wedding, get contacts, you might need to be the photographer and all the pictures might turn out terribly.	4	Didn't wear glasses at wedding. Didn't realize until later that I had blurry pictures of the bride and groom. Friend and wife weren't really upset. Friend said "Jon, you can't tell who the groom is and who the bride is".	4	Didn't wear glasses at wedding. Didn't realize until afterwards that I had blurry pictures taken of me. Friend and wife weren't too upset either. Probably because they thought I was taking pictures for fun. Probably not because they thought I was taking pictures	4
TITLE: TIFU by owing money. POST: Okay, so this wasn't today, this was yesterday, so I had lost my eftpos card right on the day owed my dad twelve bucks, as you can imagine I was actively avoiding paying my dues, so I gave the car a half hearted look and didn't find it, so I went back inside to play some video games, unfortunately my dad had a better look through the car and found it, so he dragg…	tifu	The poster lost their card and owed their dad $12, so they avoided paying until the dad found the card. They went to withdraw money, but the ATM and bank were closed. They got money from the mom, but on the way to buy cigarettes, the dad crashed into a brand new car.	5	My dad has to pay an inssurance company three thousand dollars, becuase I didn't have twelve on hand	4	I owe my dad twelve bucks, he found my eftpos card, I gave him the money, he crashed into someone else's brand new car, and now I owe my dad twelve bucks. Also my dad is a complete prick.	4	I owe my dad twelve bucks, he found my eftpos card, crashed into my mother's car, and stole my savings account. Now I owe twelve bucks more than I owe my dad. And I owe my mother twelve bucks as well.	4
TITLE: I [20s/f] ended a friendship. Now I'm going to have to be around my ex-friend [20s/m] and I don't know how to handle it. POST: We were friends for a long time, and the friendship wasn't working for a lot of reasons. We were both at fault. I haven't seen him in quite a while, and now for reasons out of our control we're going to end up spending a fair amount of time together, probably for t…	relationship_advice	Poster ended a rocky friendship and is worried about being around ex-friend. Being polite could lead to reconciling but being unfriendly would cause drama. Wants to strike a balance but is unsure how.	5	I will have to see my ex-friend, don't want to accidentally restart friendship but can't give him the cold shoulder without causing drama. Help.	5	Ended friendship with ex-friend. Now we're going to spend a fair amount of time together and I don't know how to handle it. Suggestions?	3	Ended friendship because it wasn't working out. Now we're going to spend a fair amount of time together and I don't know how to handle it. Suggestions? Or am I just screwed?	3
TITLE: Have a job offer, but not sure if I should take it... Suggestions....? POST: So, I've been unemployed for 3 months now. I realize that this isn't that long, considering how long others have been out of work, but it's still a long time for me. I quit my job 3 months ago, and because of it, I was denied unemployment. I left voluntarily because I was told by the president of the wee little st…	AskReddit	The poster has been unemployed for three months and has received a job offer out of state, which they want to take, but are concerned about their financial situation and finding a new place to live. They need advice on whether to accept the job offer or not.	5	I'm out of work, got a job offer, but it's in another state, and I have no way to get there or a place to stay once I do.	5	Haven't been unemployed long enough to qualify for unemployment, but have an offer for a job that might qualify me for unemployment. Don't know if I should take it... Suggestions?	3	Haven't worked in 3 months, got an offer for a job out of state - unsure if I should take it or not - suggestions? I've been working on finding a new place to live for months now. Anybody have any suggestions	3
TITLE: My [33 M] fiancee's [31 F] depression and weight gain are straining our relationship POST: My fiancee has struggled in the past with episodes of depression accompanied by weight gain but has always managed to pull through, never really losing the weight but never gaining more than 2 to 5kg and always being focused on fitness and healthy living. I proposed to her a little over a year ago an…	relationships	Fiancee's depression and weight gain are causing strain in relationship, need advice on how to communicate concerns.	6	Over last year of engagement, fiancee's past issues with depression and weight gain have returned with a vengeance. Do I pull out?	6	Fiancee gained 25kg in 4 years and now has depression and weight gain issues straining our relationship. How do I communicate this effectively to her and how do I help her?	6	Fiancee gained 25kg in 4 years while engaged and depressed. How do I communicate that her weight gain and extended depressive episodes are affecting everything from my attraction to her to my confidence in her ability to be a reliable mother and life partner? If	6
TITLE: How do I get/help my wife to femme it up a little? POST: I love her and this is not, **repeat not**, a deal-breaker but I'd like her to be more feminine. She grew up basically feral, has no female relatives any less feral, and is too embarrassed to talk to her friends. Feral's kind of a strong word, but I think I'll stick with it. The weird thing is that we have a young daughter who is pri…	AskReddit	A husband wants his wife to be more feminine but she grew up without female role models, and is too embarrassed to talk to friends. He wants to brush her hair and buy her perfume to encourage her to be more feminine.	5	I'll brush her hair and keep her in nice scents, but anyone got any other ideas on how to feminize my wife a bit?	4	Wife is too feminine for me and I want her to be more feminine. How do I get her to do this without making her self-conscious about it?	3	Wife is feral, takes little care of hair, perfume is a nice touch, how do I get her to femme it up a little more? (I know it's not sexy)	3
TITLE: I [23 MtF] am totally crushing on my [26 M] friend; My life is officially a soap opera POST: Hello! I'm a transgender woman and I'm kinda sorta smitten with my bisexual friend. He knows about my "condition", but what I don't know is how he feels about the whole "lady with non-standard genital configuration" thing, in regards to dating. I can't just ask him, either. Saying "Hey, how do you …	relationships	Trans woman has a crush on her bisexual friend but is afraid to reveal her feelings and unsure about his stance on dating trans women; friend is living on her couch.	4	Trans girl crushing on bi male friend. Don't know if he's into that, don't want to make things weird. He lives with me. Thinking of selling my life story to daytime TV writers.	5	~~I~~ am crushing on my bisexual friend~~ he knows about my "condition", but I don't know how he feels about dating trans women~~ I want to be closer to him~~ but I'm afraid telling him will make everything super weird~~	5	~~I~~ am crushing on my bisexual friend~~ he knows about my "condition", but I don't know how he feels about dating trans women~~ I want to be closer to him~~ but I'm afraid telling him will make everything super weird~~	5
TITLE: Can you die from complications after a plasma donation? POST: I live in a city that has a plasma donation center about a fifteen minute walk from where I live. I was donating twice a week for about three months. (twice a week is the max they allow) How it works is they draw your blood, run it through a centrifuge, take out the plasma, and return your blood cells to you mixed with an antico…	AskReddit	Person had a plasma donation and experienced complications, including light-headedness and panic attacks. They were diagnosed with slight anemia and recommended to take iron. Now they have post-traumatic stress disorder and fear they could die at any moment due to damage to their circulatory system. They are questioning whether their fears are rational or not.	4	Donated plasma, had a bad reaction, now have ptsd. Can I have complications three months down the road, such as blood clots, or arterial damage?	5	I had a plasma donation, got light headed after returning plasma, now have post traumatic stress disorder after the incident	5	Plasma donation caused me to pass out twice after donating blood twice a week for three months. Can this happen to anyone else? What can I do to prevent this from happening again?	5
TITLE: Help! I think I really messed up POST: I am going to begin with sorry for grammical errors and spelling. I am a 19 year old female and was currently in this 2 year relationship with 20 year old male. We really had the best relationship in the beginning and it was so much fun, then I started having really big issues with family. Right after I turned 18 years old my parents stopped doing eve…	relationship_advice	A 19-year-old female had a two-year relationship with a 20-year-old male who helped her a lot when she had family issues, but he eventually got annoyed and kicked her out twice. She moved in with her sister but moved back when he missed her. However, the issue of him not having a job and being embarrassed about it caused problems. She wrote a mean Facebook status about him and hurt his friend's f…	5	Had a boyfriend, I had some family issues. He let me live with him got kicked out twice. Had issues financially , wrote a mean status and now he won't talk to mean	4	Started dating a guy, had issues with family, boyfriend started treating me like shit, wrote mean Facebook status, now won't talk, need some advice...	6	Started dating a great guy, then he started treating me like shit, so I wrote a mean Facebook status, now he won't talk to me, even though I've apologized. Need some advice...........	5
TITLE: Need some advice from people in LTRs. I[30/m] have been with my wife [31/f] for 10 years, how do you know if it's time to leave? POST: Ok, a little background. My wife and I started dating in college, I was a late bloomer and she's my first real relationship. Things have been good, we of course have had our ups and downs but overall it's been good. We married a little over 3 years ago afte…	relationships	The poster is seeking advice on whether their recent desire to start a new life is a typical phase in long-term relationships or a sign that it's time to leave their wife, whom they love and have been with for 10 years.	5	Been with wife for 10 years, still love her, we have a good life, but in the last year I can't shake the urge to destroy it all and start over.	5	Married 10 years, starting to think about starting over, wondering if this is normal or if it's time to end the marriage. Need some insight from people who have been through this before.	6	Married 10 years, starting to think about starting over after feeling unhappy for years. Not sure if this is normal or if it's time to end things. Anyone else been in this situation? How did you end things?	6
TITLE: What should I do after spending an intimate night with a girl? POST: I met a wonderful girl, who for the sake of anonymity I shall call Sarah, at a ball (2 days ago.) We walked back to her place with her friend,let's call her Jane, before we left and on the way there it was made fairly clear that Sarah wanted a relationship, which is fine by me. Once we got back to Sarah's place, Jane took…	AskReddit	Met girl at ball, went back to her place with friend. Girl wanted relationship. Spent intimate night together without sex. Proposed leaving before her housemates wake up, kissed goodbye and said will call.	5	Met girl at Ball 2 days ago, had super intimate night with her, said I'd call. Spent all yesterday recovering from the lack of sleep (picture walking dead).	4	I spent an intimate night with a girl, she fell asleep in my arms, woke her house-mates up, and left without any sleep. What should I do now?	3	Met a girl at a ball 2 days ago, spent the night together, she fell asleep in my arms. Wake-up alarm went off, she got pissed off at me for waking her up. What do?	3
TITLE: TIFU by baking while drunk. POST: On Christmas Eve, I was baking cookies like I do every year. I had mixed up some snickerdoodle dough and rolled it into balls, and my daughter wanted to help. I let her roll the dough balls in cinnamon sugar while I took some of my cookies to my neighbor's house. My neighbor let me in and I dropped the cookies on his kitchen counter. We sat down in the liv…	tifu	OP got drunk while baking cookies and burned their hand on the oven rack, causing an infected blister. They usually drain blisters, but this time the skin came off and it got infected. They won't bake drunk again.	5	I burned myself very badly in the oven because I was drunk, and now it's infected and hurts really fucking bad.	6	I burned my hand while baking cookies while drunk, resulting in a huge blister on the back of my hand. Now I have a huge scar on my hand. I'm never baking drunk again. I'll post a pic if anyone wants to see it	6	Baked cookies while drunk, burned my hand while draining a blister, blisters are now infected and painful. Never baking drunk again. I'm an idiot. I'm sorry.	5
TITLE: 25m,24f, terrible breakup. POST: I feel like i'm going to stop breathing. I'm so down-right depressed I feel like my lungs are going to collapse. Girl of 5 years dumped me. Over a stupid thing. 4 times this month. We got back together... 3 times. and the last time she left me. we had a highschool reunion... and my cell went out. for about 3 and a half hours. She knew i was going to go ther…	BreakUps	Man in terrible pain after girlfriend of 5 years broke up with him over false cheating accusation. He is devastated and doesn't know what to do.	4	Jealousy, not from me.. Also, I'm just losing it. I lost it. I'm completely out of it. I just went into a state of apathy.	5	ive been dumped 4 times in 5 months... this is the worst breakup ever... I just want to stop breathing...	3	ive been dumped 4 times in 5 months... she dumped me last week... she blames everything on me... she blames everything on me... she blames everything on me... she blames everything on me... she blames everything on me... she blames everything on me	3
TITLE: Me [21F] with my boyfriend [22M] of almost four years abroad in London and don't know what I want POST: I've been dating my boyfriend for almost four years since we were 17. I've never slept with anyone else or had a real relationship besides this one. Everything between us was great the first three years. I knew how much I loved him, and we planned our life together. We spent every day to…	relationships	A woman in a long-term relationship is struggling with doubts and the desire to explore other things, while also loving her boyfriend. She is currently abroad in London and considering taking a break, but her boyfriend is against the idea. She wants advice and perspective on the situation.	6	Having serious doubts in my relationship because I'm really young. Boyfriend won't take a break--it's all or nothing with him--but I don't know if I can commit to either options.	6	Four year relationship abroad, still love my boyfriend but don't know what I want. Don't want to commit to never seeing or talking to him again but also don't want to end the relationship. Need perspective/opinions/personal anecdotes.	6	Four year relationship abroad, still love my boyfriend dearly but don't know what I want. Don't want to commit to never seeing or talking to him again but also don't want to end things completely either. Don't know what to do. Please	6
TITLE: Any doctors or med students lurking? What is the process to become a doctor like? POST: I would like to become an anesthesiologist one day. I have thought about this a lot and would like to hear what it's like from some insiders. I am really not the type who can sit behind a desk all day. I'm prepared to sit at desks for studying, but I can't do it for 30+ years. I don't want to wear a sui…	AskReddit	OP wants to become an anesthesiologist and is seeking insights from doctors or med students. They don't want a desk job and are willing to study but want to be active in their job. They are attracted to the high salary and don't want to climb the corporate ladder.	4	Above is a list of reasons why I want to become a doctor...What is medical school like? Residency? Advice? How much do you make (ballpark)?	2	I want to become an anesthesiologist one day. I want to put my work in now and come out making a high salary. What is the process like to become a doctor like?	6	I want to become an anesthesiologist one day. What is the process like to become one? What are some things that would help me become one? What are some things that would hinder me from becoming one? What are some things that would help	5
TITLE: Need help on telling if a girl likes me. POST: I'm 21 and at University at the moment, a couple of weeks ago I met a girl in a club, we walked home and had a good chat. She invited me back to her flat, but I declined. The next couple of days we did some light texting. I then about a week later decided to text her and ask her out for a drink, to this she didn't reply. I did however here fro…	askwomenadvice	A guy met a girl in a club, they texted for a bit but she didn't reply when he asked her out. They met up again and he's unsure if she likes him or not. His flatmates think she does, but he's bad at reading signals. He's wondering if he should just move on.	4	Met a girl in a club, we chatted, then the last few weeks have been a roller coaster of emotions, want to know if she's into me.	5	Met girl at club, texted her, she ignored me, met her at her flat, she got food and then went back to her room. Should I put it down as a bad experience or should I continue to pursue her?	5	Met girl at club, she invited me back to her flat but I declined saying I had work the next day so we didn't hang out. Texted her a week later asking her out for a drink but she didn't reply. Now she seems	5
TITLE: I (23M) can't tell if I really like my boyfriend (24M) or am just in the relationship for the attention/or afraid to be alone. POST: So, I've been dating this guy for about 4 months now, the entire relationship has been long distance since the beginning due to different paths having us across the country. He's extremely gungho in the relationship, sends me care packages and texts me daily.…	relationships	OP is unsure if they truly like their boyfriend or if they're just in the relationship for attention/afraid to be alone. They've been in a long-distance relationship for 4 months and don't see each other alone. They requested an open relationship, and the boyfriend said they need to be fully committed or not in the relationship at all. OP is unsure how to respond.	5	Been dating a guy, I want an open relationship and he's okay with it but I don't know if I just like the idea of him as a safety net or not.	6	Long distance boyfriend expects me to be 100% committed to the relationship but I'm not 100% committed to him either. Don't know if I really like him or am just afraid of being alone. Don't know what to do.	4	I've been dating this guy for 4 months now but we've never been alone together. He expects me to be 100% committed or he's not committed at all. Not sure if I like him enough to continue the relationship or if I'm just	3
TITLE: fell down. ruined what I've been working toward all this year. POST: I took a minor fall but because of how I landed I broke a couple of bones. That normally wouldn't be a major upset, just one of those things that happens and you get past it. But this happened two weeks to the day before the beginning of what I have been training, working, saving, and sometimes fighting for since the begi…	self	The writer fell down and broke some bones two weeks before a bike trip they have been working towards all year. They lost 50 pounds and made significant progress in their physical health but now need a recumbent or three-wheeled bike to participate in the trip. They can still go but the physical challenge was the main event for them and they are disappointed.	5	Because of a minor fall and injury I am unable to participate in the event that was the motivation and intended as a reward for me to overcome a difficult period in my life.	6	I fell down and broke my bones. I have been working hard to get back on my feet and now I have to wait until next year to start riding again. I feel pretty shitty about myself right now. I guess I just needed	5	I fell down and broke bones. I've been working hard for months to get where I am now. But now I've lost the motivation to continue. I've lost the motivation to continue working hard. I've lost the motivation	4
TITLE: My new neighbor (50's(?)/F) can hear everything I (20's/F) do in my apartment, and it's disrupting her sleep. What do? POST: My neighbor moved into the apartment adjacent to me a few days ago. Whilst she's a very nice lady, she seems to be very annoyed by my sound levels, as she can apparently hear every word I say through her walls. I'm not a particularly loud person- the noise I produce …	relationships	Neighbor can hear everything and it disturbs her sleep, seeking advice for a solution as the poster doesn't want the neighbor to suffer but also wants to maintain her way of life.	6	My neighbor's life is being disrupted by my noise levels, which would be reasonable if it weren't for the thin wall between us. What do?	6	New neighbor can hear everything I do in my apartment, even though I'm not particularly loud. What do?	5	New neighbor can hear everything I say through walls, causing her sleep problems. What can I do to remedy this situation? I'd prefer not to sound accusatory or rude, but I feel like I need to say something. I've tried talking to	3
TITLE: Me [29 M/F] with my 32 M] husband and 2 year son; secretly trying to get his Mom (my MIL) to get a job here and live with us. POST: Still kind of in shock over this. I just happened to pick up the ipad and see that my husband has been sending emails to his mother telling her that he is going to try his hardest to get her a job at his company, and that they can move into our house. He hasn'…	relationships	Husband is secretly trying to get his mother a job at his company and have her live with them, which the poster is not mentally prepared for. They have been going to therapy for other reasons.	6	Husband who gives me flack for being close to my family tells me that we will never move closer to them, meanwhile secretly planning his mother getting a job to move to our town. </b>	5	Husband secretly trying to get MIL to move down here with us. Not ready for that yet. Not ready for any more visits to see son either. Not ready for any more 'drop in' visits to see MIL either.	6	Husband secretly trying to get MIL to move down here and live with us after marriage. Hurt my brain beyond belief. Don't know what to do. Please help! I love my husband dearly but this is just... wrong. I've never heard	6
TITLE: Me [24F] not knowing how to handle my BF [24M] confessing POST: I have been with him for 3 years now. A few days ago he told me over the phone, just before bed that he is developing feelings for this other girl [22F], let's call her T. He says he still wants to be with me. A bit about T. He got to know T through a group assignment at uni last term and although the assignment is over, they'…	relationships	Girlfriend's boyfriend confesses that he has feelings for another girl, and they continue to communicate even after she voices her concerns, leading to a one week break. Boyfriend plans to meet the other girl the next day, causing more pain for the girlfriend.	5	BF confessed to me about having feelings for [22F]. I told him to cut contact. Initially he agreed to it but now he wants to meet her again.	5	Boyfriend confessed feelings for another girl after 3 years together. He continues to see her despite my request that he cut contact with her completely. Don't know if I can trust him. What do I do?	6	Boyfriend confessed feelings for another girl after 3 years together. He continues to see her despite knowing how much pain it causes me. Don't know if I can trust him anymore. What do I do?	6
TITLE: Me [25 F] with my boyfriend [24 M] of 4.5 years, have not seen or spoken to each other (besides a few texts here and there) for 2 months.(Story in comments) POST: Been dating the same guy for 4.5 years. He lives a little over an hour away. We were really close in the beginning. Over the past two years, there has been a decline. I have addressed this multiple times and he refuses to work on…	relationships	Girl hasn't seen or spoken to her boyfriend in 2 months, despite being in a 4.5 year relationship. Boyfriend has been distant and unresponsive, causing girl to question whether to mend things or break up.	6	Boyfriend does not make an effort to work on relationship. Has done some shady shit. Should I call it off.	6	Boyfriend of 4.5 years has become distant over past two years. Haven't seen or spoken to each other in 2 months. Should I try to mend things or just break-up? If so, how should I do it?	6	Been dating the same guy for 4.5 years. Haven't seen or spoken to each other for 2 months. He has made no effort to see me. Should I try to mend things or just break-up? If so, how should I	5
TITLE: I [f23] don't want to go on a second date with [m24]. He is angry and thinks I'm shallow POST: A month ago I met a 24M on Okcupid. We liked each others pictures and hit it off, and so went on the date. The date was... Cringeworthy. First off he was 5'5 at most instead of 5'9 like he said he was. I'm a 5'7 female, not a freakishly tall woman ny any means, but I do look for a man who is at l…	relationships	Female doesn't want a second date with a male who lied about his height, was inappropriate, and rude when rejected.	6	#NAME?	6	Met a guy on Okcupid. He made me uncomfortable throughout the date. He now texts me once a day and tries to convince me to 'be friends'. What can I do?	6	Met a guy on Okcupid who made me uncomfortable throughout the date. He is angry because I am only 6'5 and he thinks I am shallow. What can I do? I don't want to continue dating him. I just want to	5
TITLE: We've said I love you...but I feel like we should say it more? POST: My boyfriend and I are both 18 and have been dating for almost 9 months. He said "I love you" first after about 7 months and I said it back (I had known I love him for a few months but didn't want my saying it to pressure him since this is his first relationship). Since then I've said it like "goodnight I love you" and he…	relationships	OP is concerned that her boyfriend doesn't say "I love you" enough, but doesn't know how to bring it up. She also wants to know how often other couples say it.	6	boyfriend doesn't say I love you very often (like only has said it 4 times in the 2 months since he first said it) and not sure how to go about getting him to say it more.	6	We've said I love you but he doesn't say it first and I feel self conscious saying it first sometimes even though its really special when I hear it back. Please help! Or tell me how often other people in relationships say 'I love you	5	We've said I love you but he doesn't say it first like 4 times since the first time we said it. I feel self conscious saying it first sometimes even though its really special when I hear it back. Please help! Or tell me how	5
TITLE: Is windows 8 as a primary os sort of ready yet? POST: So As of late I've had a large stroke of bad luck and today my windows decided to go nuts. Upon starting up my laptop this morning I got a few errors, looking them up and trying to fix them I got rid of them. 10 minutes later I got a windows update so I restarted my laptop, windows 7 bootscreen comes up then a blue screen of death decid…	AskReddit	The writer's Windows 7 OS crashed and they cannot find their installation disk, so they are considering buying Windows 7 again but wondering if Windows 8 is a viable option.	6	Should I download the consumer version of windows 8 and wait for the release of windows 8 before purchasing a new windows or just purchase windows 7 now?	6	Windows 8 Consumer version is already here, windows 7 Consumer version is thrown away after a few years... Is windows 8 ready yet?	5	Windows 8 Consumer version is already here, windows 7 Consumer version is thrown away after installing windows 8 Consumer version... Is windows 8 ready yet? Or should I wait for windows 8 Pro? Or wait for windows 8 Enterprise? Or wait for windows 8 Enterprise	5
TITLE: Me [26 F] with my ?? [27/28 M] 5mo, I like him more and it sucks. POST: I think I need a kick in the pants. A few months ago I started having sex with a (not close at all) friend and everything was good. We were both recently out of relationships and it was fun. I caught the feels and things started going downhill from there. At that point we discussed it and concluded there were feelings …	relationships	A woman developed feelings for a friend who didn't want a relationship. She's struggling with her emotions and is also dating someone else casually. She wishes things could go back to just having fun.	6	I'm in two casual relationships that are very different from each other. One I like more and invest way too much of my emotions into while he pulls away and the other is exactly the opposite.	6	Started having sex with a friend recently out of a recent breakup. Started liking him more than usual and now feel guilty for feeling this way. Don't know what to do. Need some advice.	5	Started seeing a friend recently out of relationships. Started liking him more than usual after realizing feelings on both ends. Now both mutually dislike each other and it sucks. Don't know what to do. Don't want to hurt either one of them. Don	5
TITLE: What's the best/most memorable wedding you've ever been to, and why? POST: I'm helping my best friend plan her wedding. Never planned anything like a wedding before. I was hoping there would be a /r/weddingporn subreddit like /r/foodporn and /r/roomporn, but I can't find anything like that. So I thought I'd ask the hive mind: what was the most memorable wedding you've ever been to, and why…	AskReddit	OP is helping a friend plan a wedding and is looking for ideas and inspiration. Asks for stories of memorable weddings attended and is open to incorporating cool customs from other cultures/religions within their budget.	6	not asking for anyone to help me plan this wedding, but would love to hear fun stories from the most awesome weddings you've been to, hoping they'll inspire me as I plan one.	6	Looking for stories about weddings that are crazy, outrageous, or just plain weird. I'm looking for ideas for ideas. Please share!	6	Looking for stories about weddings that were crazy, outrageous, or big enough to inspire us to do something similar ourselves. Please share! I'll start! :) [Here] is the [original post.](	6
TITLE: Me [22F] with my bf[23m] been together just over a year, broken up and I cannot help but feel so guilty. POST: So me and my now ex met online July 2013. From the start I knew he was a really disciplined individual because of his eating habits ( very strict; non GMO, only free range meats etc..), his education and his martial arts career. Things were great up until 4 months ago, we would ar…	relationships	The poster describes their relationship with their disciplined ex-partner and how they argued constantly, with him analyzing her emotions and actions. After attending counseling by herself, the poster broke up with him. The ex-partner offered to go to counseling with her to save the relationship, but it was too late. The poster feels guilty about not giving him the chance to commit earlier.	4	broke up with bf, now feeling really guilty and that I didn't give him the opportunity to help fix the relationship.	5	Bf and I fought all the time over stupid things, broke up yesterday because I realized I just couldn't handle the stress anymore and now feel guilty for breaking up with him. What do I do now?	5	Started dating a guy online July 2013, things were great until 4 months ago when we would argue constantly over silly things. Started counseling July 2015 and broke up yesterday. Feeling guilty now even though I know breaking up was the right thing to do. What	5
TITLE: Me [18m] and my gf [15f] just broke up a few days ago after 2.5 years.. Where do I go now? POST: I apologize because I'm sure people on this thread have read a ton of "How do I get over her/him" posts, but this was my first serious relationship, and I am not sure where to begin with continuing my life. Basics: Me and her were dating for 2 and a half years, and we just broke up a few days a…	BreakUps	An 18-year-old guy just broke up with his girlfriend of 2.5 years and doesn't know what to do next. He's looking for advice on how to move on and not lose all the good things from their relationship, as well as what to do during his summer break before college.	5	We broke up a few days ago, I feel lost with myself and don't know what I should be doing next to continue my life.	5	Me and gf just broke up after 2.5 years, where do I go from here and what do I do to continue enjoying the things we enjoy together as friends instead of as a couple?	6	Me and gf just broke up after 2.5 years together, where do I go from here? What is my next step? I feel lost without her in my life. I love her dearly though. I just don't know what to do	6
TITLE: Gf troubles I (m18)recently found out something about my (18F) gf that is really bothering me POST: My gf and I have been dating for about a year and 4 months. We have had a good relationship with only a few hiccups, she is my first gf and I am her first bf. Lately I have been hitting the gym with my friend and I have grown close to him and is now my best friend. In recent time we have bee…	relationships	The person is upset because their girlfriend masturbated to the thought of their best friend. They asked for space to think about things but are unsure if their behavior was bad or if they overreacted. They are seeking advice on what to do next.	6	In short my gf has masturbated to the thought of my best friend and I had to find out through another friend, I have mixed feelings about the whole thing.I want to know what I should do from this point on.	6	Found out gf masturbated to the thought of my best friend which really upset me and now she called me and left a voicemail saying she was bad at giving me space and that she will leave me alone until I text or call her	6	Found out gf masturbated to the thought of best friend while sexting her, told her, she left, now she called, what should I do from here?	6
TITLE: I'm [24M] in a long distance relationship with my gf [22F]. I'm not sure how to advance this POST: We have been together for a year but we live on different continents. She's about to graduate and I've already been working for quite some time. I come visit her every chance I get and I feel like we're really compatible. How would I take this to the next level? I get thoughts of wanting to p…	relationships	24M in long distance relationship with 22F, wants to advance it but unsure how. Considering proposing but worried it's too much to ask her to leave her life and move. Asked indirectly but wants her to make decision based on her own choice.	6	gf lives in another continent. Not sure how to ask her to give up her life to marry and live with me	6	Long distance relationship with gf. Not sure how to advance the relationship further because I feel like I'd be settling for her rather than being happy with her. Is this wrong? Should I end the relationship now before it gets too serious?	6	Long distance relationship with gf. We've been together for a year but live on different continents. Not sure how to advance the relationship further. Any suggestions? I love her dearly but I feel like I'd be settling for her if she were to	6
TITLE: Me [35F] with my boyfriend [38M] 2.5 years, I think I just gave him an ultimatum? **UPDATE** POST: [Original post. ]( We had breakfast a week later and talked about everything, the house and whatnot, and he said he is working on it and he feels awful about it and doesn't want to lose me and he missed me a lot this week. He said his goal is to be in there by the end of the month and I reite…	relationships	Woman gives ultimatum to boyfriend about moving in together, he agrees to move in by end of month and proposes to her by end of year. They had a good conversation and sex.	5	He moved into his house and has a plan to propose by the end of the year. He seemed to "get it".	4	I told my boyfriend that I want more than what we have now and he agreed, but he also agreed that he will propose by the end of the year. I asked him to tell my parents the plan so they will stop asking me or saying OH	5	I told my boyfriend that I want more than what we have now and he agreed to propose by the end of the year. He made a good point about how eager I was to start our life together and he agreed to propose before the end of the	4
TITLE: How do I safely lower my libido? POST: I'm a 20 year old female and I get that this is only normal considering my age but I can't handle myself anymore. I have never had sex and don't plan on it right now due to body issues etc. I masturbate everyday and sometimes more than once. I stopped watching porn because its unfulfilling and instead sext/phone sex with a guy friend of mine. I've bee…	askwomenadvice	A 20-year-old female wants to lower her libido due to body issues and not wanting to have sex. She masturbates daily, sexts with a friend, goes to the gym, and eats healthy but still feels horny all the time. She wants advice on how to lower her libido.	6	Don't want sex due to body issues. High libido has me frustrated, and unfulfilled all the time even after masturbating. Help me	6	I've never had sex and masturbate everyday but feel horny all the time even though I've been eating healthy and exercising regularly. How do I lower my libido?	6	I've never had sex and masturbate everyday due to body issues etc. How do I safely lower my libido so I can enjoy sex more often? Thank you	5
TITLE: 25M professional artist/animator/illustrator dating hobbyist artists. How to deal? POST: Not sure how useful it is to post this here but here goes. I am usually pretty critical about art in general. I'm excited when people are into it but it's really difficult when someone says they do art, you date them then they link you to their deviantart and it's all really really amateur sketches of …	relationships	A professional artist is struggling to date hobbyist artists who are not good at art. They want to know how to deal with the situation without being an asshole.	6	When meeting an awesome person who happens to do art as a hobby, but turns out to be really bad at it, how do I, as a professional artist date someone without lying about it? T_T	5	Dating hobbyist artists who turn out to be amateur artists. Can't just say 'yeah it's good' when I'm critical of their work. Need advice on how to overcome this stereotype.	5	Dating hobbyist artists who turn out to be amateur artists who turn out to be amateur artists who turn out to be amateur artists who turn out to be amateur artists who turn out to be amateur artists who turn out to be amateur artists who turn out to	4
TITLE: Girlfriends[32] ex still hangs out with her daughter. POST: Hello, Recently things have gotten more serious with my gf who is 32 and has a daughter and myself who is 29 and has no kids. She broke up with her ex somewhat recently, maybe 6 months ago or so. Her ex constantly calls to talk to her daughter (nearly nightly) and watches her probably one or two nights a week, and hangs out with h…	relationships	Poster's girlfriend's ex still hangs out with her daughter and it's starting to worry Poster. Ex calls daughter almost nightly, watches her for 1-2 nights a week and spends weekends with her. Poster finds it suspicious and questions his girlfriend but the conversation went nowhere. Ex is taking daughter for a week and a half camping trip which makes Poster feel uncomfortable. Poster wonders if th…	5	girlfriend has an ex that is extremely close with daughter after break up, thus staying close to her. I wonder if it's time to ween them apart or the proper way to handle this, or if I'm being crazy.	6	Gf's ex hangs out with her daughter almost every weekend and seems to be trying to keep hooks in the future through the child. Am I being crazy for thinking this is wrong?	6	Gf[32] ex[32] hangs out with her daughter almost every weekend and takes her camping trip for a week and half. What gives? Is this normal? Is this manipulative? Is this normal? Is this	5
TITLE: My friend [16 F] is hurt by what her boyfriend [15 M]of one/two months said about her POST: My friend (Mary) was Face timing with her boyfriend (Joe) and started to ask him about what he dislikes about her. Joe mentions that he doesn't really like Mary's small chest and dislikes her bony hands. (She's really skinny). Of course, Mary is hurt by this and I'm not sure how to judge Joe. He has…	relationships	Friend's boyfriend made hurtful comments about her physical appearance. Friend is hurt and unsure how to react. Questioning if boyfriend genuinely loves her.	6	Joe told Mary he finds Mary's small chest and bony hands unappealing. How should she feel about this?	5	My friend is hurt by what her boyfriend said about her physical qualities and how should a person react to this kind of confession? Does he genuinely love her if he finds these physical qualities about her a bit unappealing?	6	Friend's boyfriend confessed that he dislikes her physical features and she is hurt by this confession. How should a person react to this kind of confession? Does he genuinely love her if he finds these physical qualities about her a bit unappealing?	5
TITLE: I need some advice regarding a female friend of mine. (she's almost 20 and i'm almost 22) POST: Okay, I've been friends with this girl for about 10 months. I first met her at college about a year ago. She had a boyfriend at first, but eventually she broke up with him, and started to pay more attention to me. Soon, we went out several times, started to text a lot, etc. She made it seem like…	relationships	Friend likes a girl, but she started dating another guy. Girl's boyfriend is going to NYC with an attractive female friend and has a history of cheating, causing girl to be worried. Friend wants advice on how to approach the situation without ruining his chance with the girl in the future.	5	Girl I really like friendzoned me, is currently dating a scumbag. What do I do to tell her my feelings on the subject without hurting my future chances with her?	6	Friend of mine is dating a guy who cheated on his previous girlfriend, but claims that he would never do it again. Don't know what to do.	6	Friendzoned by girl who has been dating another guy for a couple months. Don't want to ruin future chances by giving her a piece of my mind. Need advice. Halp.	3
TITLE: TIFU by inviting the locals to hang out with the hairy twins POST: Ok as is quite common, this didn't happen today, this happened many years ago in the far north Australian town of cooktown Cooktown, was a great place, heaps of Sun, good fishing etc. But just my luck as a young boy, I ventured into the Bush to get my fishing line (my bad for a terrible cast) and disturbed some local native…	tifu	The author accidentally disturbed some local natives while fishing in Cooktown, Australia. Later he couldn't feel himself peeing or taking a shit and discovered a paralysis tick had buried its head in his scrotum. After unsuccessful attempts to remove it, he had surgery to remove a portion of his scrotum, leaving him with a scar and difficulty peeing.	4	I wandered into the forest, picked up a vampiric hitchhiker that ruined my ability to urinate for the rest of my life and had lost part of my scrotum.	6	invited the locals to hang out with the hairy twins, they had a tick in the back of their scrotum, removed it with metho on your balls	4	Invited locals to hang out with hairy twins, they couldn't feel their balls, removed them with metho on your balls and now have a tight shiny scarred scrotum. Not recommended for children.	4
TITLE: My GF [25, F] and I [24, M] live together, but she lost her job and isn't really trying to find a new one. [3 years, 9 months cohabiting] POST: My GF lost her job 3 weeks ago today. As of this point, to the best of my knowledge, she has only submitted a single resume to a potential employer, despite being home all the time. She didn't even file for her unemployment benefits until Saturday,…	relationships	GF lost job 3 weeks ago but isn't trying to find another, only submitted one resume and filed for unemployment 19 days later, OP can afford rent but is bothered by GF's lack of motivation to find a job, relationship strained, 50/50 on continuing, GF has nowhere to go if they break up, seeking advice.	4	GF is not looking for a job, not helping to ease my burden, and has nowhere to go if things were to end. 3 weeks, 1 resume. No unemployment filed until this last weekend. Help?	6	GF lost her job 3 weeks ago, hasn't found a new one despite being home all the time. Not trying to find a new job despite having 50 hours of extra free time a week. Not sure what to do.	6	My GF lost her job 3 weeks ago, hasn't found another one despite applying for several jobs locally and applying for unemployment benefits. What do I do? Should I end things now before things get worse? Or wait until she finds a new job?	6
TITLE: I am sick and tired of having to deal with my severely depressed and sometimes seemingly suicidal friend. POST: My friend, lets call him Dude, has been dealing with depression (undiagnosed but I know for sure it is, he just refuses to see a doctor or tell his family) For almost a year now he has been doing nothing but complaining and whining about the same three things, every day. No matte…	offmychest	A friend has been complaining about the same things for a year and seems to be depressed and sometimes suicidal. They refuse to seek help and constantly talk about a mutual friend they're in love with who doesn't feel the same way. The writer is tired of repeating the same things and considering telling the friend's parents if they continue to refuse help and get closer to harming themselves.	4	My friend is depressed yet wont seek help and repeats the same cycle over and over again and I cant deal with watching him anymore.	5	Friend is depressed and constantly complains about the same things every day, constantly breaking down and questioning his life choices. Im tired of having to repeat myself over and over again. Im tired of having to deal with his constant negativity. Im tired of having to	4	Friend is depressed and constantly complains about everything, constantly breaking down and questioning his life choices yet refuses to seek help or tell anyone else how he feels. Im tired of dealing with this shit and Im tired of watching him destroy himself yet continue to refuse help	4
TITLE: Help, please. M(26)y WiF(25)e and I just looked at our wedding photos and she hates them. POST: So my wife and I have been married for two months and we just got our first look at our wedding photos. She hates them. My wife feels like there are a ton of photos of my family and hardly any of her's, in truth our photographer did appear to focus on my family. In addition, she felt like a lot …	relationships	Wife hates wedding photos, photographer is a church member, couple wants to avoid drama with the pastor dad, looking for a solution to make wife happy.	6	Wife hates our wedding photos and I am looking for some advise on a possible solution. Anyone been in a similar situation and have any advise or ideas?	6	Wife hates wedding photos, photographer is a good friend of ours, looking for a solution where I can do something special for her and keep it between us and family. Has anyone been in a similar situation or have any ideas of what I can do	5	Wife hates wedding photos. Looking for possible solution to help ease her anger and make up for some of the bad ones. Please help! Thanks!	5
TITLE: (21F) Found porn on my bf's (21M) tablet. He says it's not his, but no one else has used his tablet. POST: Background: Him and I have been together for about 1 year and a half. He's only given me a reason to doubt him once, and I can't actually blame him for it because we were not technically together. That's whole other story. Now, it's not that I don't care if he looks at porn, because I…	relationships	Girlfriend found porn on boyfriend's tablet, he denies it's his but no one else used it. She's confused and wondering if he's lying or if it's possible for porn to appear on a device accidentally.	6	Found porn of bf's tablet. He says it's not his and he's never lied to me before (that I'm aware of). Am I being naive to believe him or is he a liar? So confused...	6	Found porn on bf's tablet. He claims it's not his. No one else has used his tablet. Is he lying or is this really weird? Please help!	6	Found porn on bf's tablet that he claims isn't his. He claims it's not his because he no longer feels the need to look at porn. Is he lying or is this just weird? Please help! I feel stupid asking this question	6
